# Supplementary material
Source: ML conference proceedings conference paper supplement (https://proceedings.mlr.press/v108/magnusson20a.html)
Supplement: Supplementary file 1 [file magnusson20a-supp.pdf]

# Leave-One-Out Cross-Validation for Bayesian Model Comparison in Large Data - Supplementary Material

Johan Jonasson, Måns Magnusson, Michael Riis Andersen, Aki Vehtari

## Proofs

The main quantity of interest is the mean expected log pointwise predictive density, which we want to use for model evaluation and comparison.

**Definition 1** ( $\overline{\text{elpd}}$ ). *The mean expected log pointwise predictive density for a model  $p$  is defined as*

$$\overline{\text{elpd}} = \int p_t(x) \log p(x) dx$$

where  $p_t(x) = p(x|\theta_0)$  is the true density at a new unseen observation  $x$  and  $\log p(x)$  is the log predictive density for observation  $x$ .

We estimate  $\overline{\text{elpd}}$  using *leave-one-out cross-validation (loo)*.

**Definition 2** (Leave-one-out cross-validation). *The loo estimator  $\overline{\text{elpd}}_{\text{loo}}$  is given by*

$$\overline{\text{elpd}}_{\text{loo}} = \frac{1}{n} \sum_{i=1}^n \pi_i, \tag{1}$$

where  $\pi_i = \log p(y_i|y_{-i}) = \int \log p(y_i|\theta) p(\theta|y_{-i}) d\theta$ .

To estimate  $\overline{\text{elpd}}_{\text{loo}}$  in turn, we use difference estimator. Definitions follow.

**Definition 3.** *Let  $\tilde{\pi}_i$  be any approximation of  $\pi_i$ . The difference estimator of  $\overline{\text{elpd}}_{\text{loo}}$  based on  $\tilde{\pi}_i$  is given by*

$$\widehat{\overline{\text{elpd}}}_{\text{loo,diff}} = \frac{1}{n} \left( \sum_{i=1}^n \tilde{\pi}_i + \frac{n}{m} \sum_{j \in \mathcal{S}} (\pi_j - \tilde{\pi}_j) \right),$$

where  $\mathcal{S}$  is the subsample set,  $m$  is the subsampling size, and the probability of subsampling observation  $i$  is  $1/n$ , i.e. the subsample is uniform with replacement.

One important estimator of  $\pi_i$  among others is the importance sampling estimator

$$\log \hat{p}(y_i|y_{-i}) = \log \left( \frac{\frac{1}{S} \sum_{s=1}^S p(y_i|\theta_s) r(\theta_s)}{\frac{1}{S} \sum_{s=1}^S r(\theta_s)} \right), \quad (2)$$

where  $r(\theta)$  is any suitable weight function such that  $0 < r(\theta) < \infty$  for all  $\theta \in \Theta$  and  $(\theta_1, \dots, \theta_S)$  is a sample from a suitable approximation of the posterior  $p(\theta|y)$ . We are in particular interested in the weight function

$$\begin{aligned} r(\theta_s) &= \frac{p(\theta_s|y_{-i})}{p(\theta_s|y)} \frac{p(\theta_s|y)}{q(\theta_s|y)} \\ &\propto \frac{1}{p(y_i|\theta_s)} \frac{p(\theta_s|y)}{q(\theta_s|y)} \end{aligned} \quad (3)$$

and where  $q(\cdot|y)$  is an approximation of the posterior distribution that satisfies for each  $y$  that  $q(\theta|y)$  iff  $\theta \in \Theta$ ,  $\theta_s$  is a sample point from  $q$  and  $S$  is the total posterior sample size. (The condition on  $q$  makes sure that  $0 < r(\theta) < \infty$  for all  $\theta$ .)

In the case of truncated importance sampling, we instead truncate these weights and replace  $r$  with  $r_\tau$  given by

$$r_\tau(\theta_s) = \min(r(\theta_s), \tau), \quad (4)$$

where  $\tau > 0$  is the weight truncation [see Ionides, 2008, for a more elaborate discussion on the choice of  $\tau$ ].

## Proof of Proposition 1

**Proposition 1.** *The estimators  $\widehat{\text{elpd}}_{\text{diff}}$  and  $\hat{\sigma}_{\text{loo}}^2$  are unbiased with regard to  $\text{elpd}_{\text{diff}}$  and  $\sigma_{\text{loo}}^2$ .*

*Proof.* We start out by proving unbiasedness for the general estimator. Write the difference estimator as

$$\widehat{\text{elpd}}_{\text{loo,diff}} = \sum_{i=1}^n \tilde{\pi}_i + \frac{n}{m} \sum_{i=1}^n \sum_{j \in \mathcal{S}} I_{ij} (\pi_j - \tilde{\pi}_j),$$

where  $I_{ij}$  is the indicator that data point  $i$  is chosen as the  $j$ 'th point of the subsample. Since  $\mathbb{E}[I_{ij}] = 1/n$ , the expectation of the double sum is  $\sum_i (\pi_i - \tilde{\pi}_i)$  and  $\mathbb{E}[\widehat{\text{elpd}}_{\text{loo,diff}}] = \sum_i \pi_i$  as desired.

Next we prove unbiasedness of  $\hat{\sigma}_{\text{loo,diff}}^2$ . We are interested in estimating the finite sampling variance using the difference estimator. This can be done as

$$\sigma_{\text{loo}}^2 = \frac{1}{n} \sum_{i=1}^n (\pi_i - \bar{\pi})^2 \quad (5)$$

$$= \frac{1}{n} \underbrace{\sum_{i=1}^n \pi_i^2}_a - \underbrace{\left( \frac{1}{n} \sum_{i=1}^n \pi_i \right)^2}_b \quad (6)$$

We can estimate  $a$  and  $b$  separately as follows. The first part can be estimated using the difference estimator with  $\tilde{\pi}_i^2$  as auxiliary variable. Let  $t_\epsilon = \sum_{i=1}^n \epsilon_i = \sum_{i=1}^n \pi_i^2 - \tilde{\pi}_i^2 = t_{\pi^2} - t_{\tilde{\pi}^2}$ , then we can estimate  $a$  as

$$\hat{a} = \frac{1}{n} (t_{\pi^2} + \hat{t}_\epsilon),$$

where

$$\hat{t}_\epsilon = \frac{n}{m} \sum_{j \in \mathcal{S}} (\pi_j^2 - \tilde{\pi}_j^2).$$

From the previous section, it follows directly that

$$E(\hat{a}) = \frac{1}{n} t_{\pi^2} = \frac{1}{n} \sum_{i=1}^n \pi_i^2,$$

The second part,  $b$ , can then be estimated as

$$\hat{b} = \frac{1}{n^2} [\hat{t}_\epsilon^2 - v(\hat{t}_\epsilon) + 2t_{\tilde{\pi}}\hat{t}_\pi - t_{\tilde{\pi}}^2], \quad (7)$$

with the expectation

$$E(\hat{b}) = \frac{1}{n^2} [E(\hat{t}_\epsilon^2) - E(v(\hat{t}_\epsilon)) + 2t_{\tilde{\pi}}E(\hat{t}_\pi) - t_{\tilde{\pi}}^2] \quad (8)$$

$$= \frac{1}{n^2} [V(\hat{t}_\epsilon) + E(\hat{t}_\epsilon)^2 - V(\hat{t}_\epsilon) + 2t_{\tilde{\pi}}t_\pi - t_{\tilde{\pi}}^2] \quad (9)$$

$$= \frac{1}{n^2} [t_\epsilon^2 + 2t_{\tilde{\pi}}t_\pi - t_{\tilde{\pi}}^2] \quad (10)$$

$$= \frac{1}{n^2} [(t_\pi - t_{\tilde{\pi}})^2 + 2t_{\tilde{\pi}}t_\pi - t_{\tilde{\pi}}^2] \quad (11)$$

$$= \frac{1}{n^2} t_\pi^2 = \left( \frac{1}{n} \sum_{i=1}^n \pi_i \right)^2 \quad (12)$$

Using that

$$E(v(\hat{t}_\epsilon)) = n^2 \left( 1 - \frac{m}{n} \right) \frac{E(s_\epsilon^2)}{m} = n^2 \left( 1 - \frac{m}{n} \right) \frac{S_\epsilon^2}{m} = V(\hat{t}_\epsilon). \quad (13)$$

Combining the results we have that

$$E(\hat{a} - \hat{b}) = \frac{1}{n} \sum_{i=1}^n \pi_i^2 - \left( \frac{1}{n} \sum_{i=1}^n \pi_i \right)^2 = \sigma_{\text{loo}}^2. \quad (14)$$

□

**Remark.** We believe this has probably been proven before, and hence this is probably not a new theoretical result.

### Proof of Proposition 2 and 3

The proof follows, in general, the proof of Magnusson et al. [2019]. A generic Bayesian model is considered; a sample  $(y_1, y_2, \dots, y_n)$ ,  $y_i \in \mathcal{Y} \subseteq \mathbb{R}$ , is drawn from a true density  $p_t = p(\cdot | \theta_0)$  for some true parameter  $\theta_0$ . The parameter  $\theta_0$  is assumed to be drawn from a prior  $p(\theta)$  on the parameter space  $\Theta$ , which we assume to be an open and bounded subset of  $\mathbb{R}^d$ .

Several conditions are used. They are as follows.

- (i) the likelihood  $p(y|\theta)$  satisfies that there is a function  $C : \mathcal{Y} \rightarrow \mathbb{R}_+$ , such that  $\mathbb{E}_{y \sim p_t}[C(y)^2] < \infty$  and such that for all  $\theta_1$  and  $\theta_2$ ,  $|p(y|\theta_1) - p(y|\theta_2)| \leq C(y)p(y|\theta_2)\|\theta_1 - \theta_2\|$ .
- (ii)  $p(y|\theta) > 0$  for all  $(y, \theta) \in \mathcal{Y} \times \Theta$ ,
- (iii) There is a constant  $M < \infty$  such that  $p(y|\theta) < M$  for all  $(y, \theta)$ ,
- (iv) all assumptions needed in the Bernstein-von Mises (BvM) Theorem [Walker, 1969],
- (v) for all  $\theta$ ,  $\int_{\mathcal{Y}} (-\log p(y|\theta)) p(y|\theta) dy < \infty$ .

#### Remarks.

- There are alternatives or relaxations to (i) that also work. One is to assume that there is an  $\alpha > 0$  and  $C$  with  $\mathbb{E}_y[C(y)^2] < \infty$  such that  $|p(y|\theta_1) - p(y|\theta_2)| \leq C(y)p(y|\theta_2)\|\theta_1 - \theta_2\|^\alpha$ . There are many examples when (i) holds, e.g. when  $y$  is normal, Laplace distributed or Cauchy distributed with  $\theta$  as a one-dimensional location parameter.
- The assumption that  $\Theta$  is bounded will be used solely to draw the conclusion that  $\mathbb{E}_{y, \theta} \|\theta - \theta_0\| \rightarrow 0$  as  $n \rightarrow \infty$ , where  $y$  is the sample and  $\theta$  is either distributed according to the true posterior (which is consistent by BvM) or according to a consistent approximate posterior. The conclusion is valid by the definition of consistency and the fact that the boundedness of  $\Theta$  makes  $\|\theta - \theta_0\|$  a bounded function of  $\theta$ . If it can be shown by other means for special cases that  $\mathbb{E}_{y, \theta} \|\theta - \theta_0\| \rightarrow 0$  despite  $\Theta$  being unbounded, then our results also hold.

**Proposition 2.** For any approximation  $\tilde{\pi}_i$  that converges in  $L^1$  to  $\pi_i$ , we have that  $\widehat{\text{elpd}}_{\text{loo,diff}}$  converges in  $L^1$  to  $\overline{\text{elpd}}_{\text{loo}}$ .

*Proof.* For convenience we will write  $\hat{e} := \widehat{\text{elpd}}_{\text{loo,diff}}$ , which for our purposes is more usefully expressed as

$$\hat{e} = \frac{1}{n} \left( \sum_{i=1}^n \log \tilde{\pi}_i + \frac{n}{m} \sum_{i=1}^n \sum_{j=1}^m I_{ij} (\pi_i - \tilde{\pi}_i) \right),$$

where  $I_{ij}$  is the indicator that sample point  $y_i$  is chosen in draw  $j$  for the subsample used in  $\hat{e}$ .

We then get, with respect to all randomness involved (i.e. the randomness in generating  $y$  and the randomness in choosing the subsample in  $\hat{e}$ )

$$\begin{aligned} \mathbb{E}|\hat{e} - \overline{\text{elpd}}_{\text{loo}}| &\leq \frac{1}{n} \mathbb{E} \left[ \sum_1^n |\tilde{\pi}_i - \pi_i| + \frac{n}{m} \sum_{i=1}^n \sum_{j=1}^m I_{ij} |\pi_i - \tilde{\pi}_i| \right] \\ &= \mathbb{E}|\log \tilde{\pi}_i - \pi_i| + \frac{1}{m} \sum_{i=1}^n \sum_{j=1}^m \frac{1}{n} \mathbb{E}|\pi_i - \tilde{\pi}_i| \\ &= 2\mathbb{E}|\tilde{\pi}_i - \pi_i| \\ &\rightarrow 0. \end{aligned}$$

□

**Proposition 3.** Let the subsampling size  $m$  and the number of posterior draws  $S$  be fixed at arbitrary integer numbers, let the sample size  $n$  grow, assume that (i)-(vi) hold and let  $q = q_n(\cdot|y)$  be any consistent approximate posterior. Write  $\hat{\theta}_q = \arg \max\{q(\theta) : \theta \in \Theta\}$  and assume further that  $\hat{\theta}_q$  is a consistent estimator of  $\theta_0$ . Then

$$\tilde{\pi}_i \rightarrow \pi_i$$

in  $L^1$  for any of the following choices of  $\pi_i$ ,  $i = 1, \dots, n$ .

- (a)  $\tilde{\pi}_i = \log p(y_i|y)$ ,
- (b)  $\tilde{\pi}_i = \mathbb{E}_y[\log p(y_i|y)]$ ,
- (c)  $\tilde{\pi}_i = \mathbb{E}_{\theta \sim q}[\log p(y_i|\theta)]$ ,
- (d)  $\tilde{\pi}_i = \log p(y_i|\mathbb{E}_{\theta \sim q}[\theta])$ ,
- (e)  $\tilde{\pi}_i = \log p(y_i|\hat{\theta}_q)$ .
- (f)  $\tilde{\pi}_i = \log p(y_i|y) + V_{\theta \sim p(\cdot|y)}(\log p(y_i|\theta))$ .
- (g)  $\tilde{\pi}_i = \log p(y_i|y) - \nabla \log p(y_i|\hat{\theta})^T \Sigma_{\theta} \nabla \log p(y_i|\hat{\theta})$  for any given fixed  $\hat{\theta}$  and where the covariance matrix is with respect to  $\theta \sim p(\cdot|y)$ .

- (h)  $\tilde{\pi}_i = \log p(y_i|y) - \nabla \log p(y_i|\hat{\theta})^T \Sigma_\theta \nabla \log p(y_i|\hat{\theta}) - \frac{1}{2} \text{tr}(\mathbf{H}_{\hat{\theta}} \Sigma_\theta \mathbf{H}_{\hat{\theta}}) \Sigma_\theta$  for any given fixed  $\hat{\theta}$  and where the covariance matrix is as in (g)
- (i)  $\tilde{\pi}_i = \log p(y_i|\hat{\theta}_q) - \nabla \log p(y_i|\hat{\theta})^T \Sigma_\theta \nabla \log p(y_i|\hat{\theta})$  for any given fixed  $\hat{\theta}$  and where the covariance matrix is as in (g)
- (j)  $\tilde{\pi}_i = \log p(y_i|y) - \nabla \log p(y_i|\hat{\theta})^T \Sigma_\theta \nabla \log p(y_i|\hat{\theta}) - \frac{1}{2} \text{tr}(\mathbf{H}_{\hat{\theta}} \Sigma_\theta \mathbf{H}_{\hat{\theta}}) \Sigma_\theta$  for any given fixed  $\hat{\theta}$  and where the covariance matrix is as in (g)
- (k)  $\tilde{\pi}_i = \log \hat{p}(y_i|y_{-i})$  as defined in (2) for any weight function  $r$  such that  $r(\theta) > 0$  for all  $\theta \in \Theta$ .

**Note.** Part (k) holds in particular for the weight functions (3) and (4).

*Remark.* By the variational BvM Theorems of Wang and Blei [2019],  $q$  can be taken to be either  $q_{Lap}$ ,  $q_{MF}$  or  $q_{FR}$ , i.e. the approximate posteriors of the Laplace, mean-field or full-rank variational families respectively in Proposition 3, provided that one adopts the mild conditions in their paper.

The proof of Proposition 3 will be focused on proving (a) and then (b)-(e) will follow easily and (f)-(l) with only a few simple observations on the posterior variance of  $\theta$ . Note that parts (a)-(e) are contained in Magnusson et al. [2019] and the proof of them is identical to that. Proposition 3 follows immediately from the following lemma.

**Lemma 4.** *With all quantities as defined above,*

$$\mathbb{E}_{y \sim p_t} |\pi_i - \log p(y_i|\theta_0)| \rightarrow 0, \quad (15)$$

*with any of the definitions (a)-(e) of  $\pi_i$  of Proposition 3. Furthermore,*

$$\mathbb{E}_{y \sim p_t} |\log p(y_i|y_{-i}) - \log p(y_i|\theta_0)| \rightarrow 0, \quad (16)$$

*as  $n \rightarrow \infty$ .*

*Proof.* To avoid burdening the notation unnecessarily, we write throughout the proof  $\mathbb{E}_y$  for  $\mathbb{E}_{y \sim p_t}$ . For now, we also write  $\mathbb{E}_\theta$  as shorthand for  $\mathbb{E}_{\theta \sim p(\cdot|y_{-i})}$ . Recall that  $x_+ = \max(x, 0) = \text{ReLU}(x)$ .

Hence

$$\begin{aligned} \mathbb{E}_y \left[ \left( \log \frac{p(y_i|y_{-i})}{p(y_i|\theta_0)} \right)_+ \right] &= \mathbb{E}_y \left[ \left( \log \frac{\mathbb{E}_\theta [p(y_i|\theta)]}{p(y_i|\theta_0)} \right)_+ \right] \\ &\leq \mathbb{E}_y \left[ \log \left( 1 + \frac{\mathbb{E}_\theta [C(y_i) p(y_i|\theta_0) \|\theta - \theta_0\|]}{p(y_i|\theta_0)} \right) \right] \\ &\leq \mathbb{E}_{y,\theta} [C(y_i) \|\theta - \theta_0\|] \\ &\leq (\mathbb{E}_{y_i} [C(y_i)^2] \mathbb{E}_{y,\theta} [\|\theta - \theta_0\|^2])^{1/2} \\ &\rightarrow 0 \text{ as } n \rightarrow \infty. \end{aligned}$$

Here the first inequality follows from condition (i) and the second inequality from the fact that  $\log(1+x) < x$  for  $x \geq 0$ . The third inequality is Schwarz inequality. The limit conclusion follows from the consistency of the posterior  $p(\cdot|y_{-i})$  and the definition of weak convergence, since  $\|\theta - \theta_0\|^2$  is a continuous bounded function of  $\theta$  (recall that  $\Theta$  is bounded) and that the first factor is finite by condition (i).

For the reverse inequality,

$$\begin{aligned} \mathbb{E}_y \left[ \left( \log \frac{p(y_i|\theta_0)}{p(y_i|y_{-i})} \right)_+ \right] &= \mathbb{E}_y \left[ \left( \log \mathbb{E}_\theta \left[ \frac{p(y_i|\theta_0)}{p(y_i|\theta)} \right] \right)_+ \right] \\ &\leq \mathbb{E}_y \left[ \log \left( 1 + \mathbb{E}_\theta \left[ \frac{C(y_i)p(y_i|\theta)\|\theta - \theta_0\|}{p(y_i|\theta)} \right] \right) \right] \\ &\leq (\mathbb{E}_{y_i}[C(y_i)^2] \mathbb{E}_{y,\theta} [\|\theta - \theta_0\|^2])^{1/2} \\ &\rightarrow 0 \text{ as } n \rightarrow \infty. \end{aligned}$$

This proves (16) and an identical argument (now letting  $\mathbb{E}_\theta$  stand for  $\mathbb{E}_{\theta \sim p(\cdot|y)}$ ) proves (15) for  $\tilde{\pi}_i = p(y_i|y)$ .

For  $\tilde{\pi}_i = -\mathbb{E}_y[\log p(y_i|y)]$ , note first that

$$\begin{aligned} \mathbb{E}_y |\mathbb{E}_y[\log p(y_i|y)] - \mathbb{E}_y[\log p(y_i|y_{-i})]| &= |\mathbb{E}_y[\log p(y_i|y) - \log p(y_i|y_{-i})]| \\ &\leq \mathbb{E}_y |\log p(y_i|y) - \log p(y_i|y_{-i})| \end{aligned}$$

which goes to 0 by (16) and (a). Hence we can replace  $\tilde{\pi}_i = -\mathbb{E}[\log p(y_i|y)]$  with  $\tilde{\pi}_i = -\mathbb{E}[\log p(y_i|y_{-i})]$  when proving (b). To that end, observe that

$$\begin{aligned} (\mathbb{E}_y[\log p(y_i|y_{-i})] - \log p(y_i|\theta_0))_+ &= \left( \mathbb{E}_{y_i} \left[ \mathbb{E}_{y_{-i}} \left[ \log \frac{p(y_i|y_{-i})}{p(y_i|\theta_0)} \right] \right] \right)_+ \\ &\leq \mathbb{E}_y \left[ \left( \log \frac{p(y_i|y_{-i})}{p(y_i|\theta_0)} \right)_+ \right]. \end{aligned}$$

where the inequality is Jensen's inequality used twice on the convex function  $x \rightarrow x_+$ . Now everything is identical to the proof of (16) and the reverse inequality is analogous.

The other choices of  $\tilde{\pi}_i$  follow along very similar lines. For  $\tilde{\pi}_i = -\log p(y_i|\hat{\theta}_q)$ , we have on mimicking the above that

$$\mathbb{E}_y \left[ \left( \log \frac{p(y_i|\hat{\theta}_q)}{p(y_i|\theta_0)} \right)_+ \right] \leq (\mathbb{E}_{y_i}[C(y_i)^2] \mathbb{E}_y [\|\hat{\theta}_q - \theta_0\|^2])^{1/2}$$

and  $\mathbb{E}_y[\|\hat{\theta}_q - \theta_0\|^2] \rightarrow 0$  as  $n \rightarrow \infty$  by the assumed consistency of  $\hat{\theta}_q$ . The reverse inequality is analogous and (15) for  $\pi_i = p(y_i|\hat{\theta}_q)$  is established.

For the case  $\tilde{\pi}_i = -\log p(y_i|\mathbb{E}_{\theta \sim q}\theta)$ , the analogous analysis gives

$$\mathbb{E}_y \left[ \left( \log \frac{p(y_i|\mathbb{E}_{\theta \sim q}\theta)}{p(y_i|\theta_0)} \right)_+ \right] \leq \mathbb{E}_{y_i}[C(y_i)^2] \mathbb{E}_y [\|\mathbb{E}_{\theta \sim q}\theta - \theta_0\|^2].$$

Since  $x \rightarrow \|x - \theta_0\|^2$  is convex, the second factor on the right hand side is bounded by  $\mathbb{E}_{y, \theta \sim q}[\|\theta - \theta_0\|^2]$  which goes to 0 by the consistency of  $q$  and the boundedness of  $\Theta$ . The reverse inequality is again analogous.

For  $\tilde{\pi}_i = -\mathbb{E}_{\theta \sim q}[\log p(y_i|\theta)]$ ,

$$\begin{aligned} \mathbb{E}_y \left[ (\mathbb{E}_{\theta \sim q}[\log p(y_i|\theta)] - \log p(y_i|\theta_0))_+ \right] &= \mathbb{E}_y \left[ \left( \mathbb{E}_{\theta \sim q} \left[ \log \frac{p(y_i|\theta)}{p(y_i|\theta_0)} \right] \right)_+ \right] \\ &\leq \mathbb{E}_{y, \theta \sim q} \left[ \left( \log \frac{p(y_i|\theta)}{p(y_i|\theta_0)} \right)_+ \right] \\ &\leq (\mathbb{E}_{y_i}[C(y_i)^2] \mathbb{E}_{y, \theta \sim q}[\|\theta - \theta_0\|^2])^{1/2} \rightarrow 0 \end{aligned}$$

as  $n \rightarrow \infty$  by the consistency of  $q$ . Here the first inequality is Jensen's inequality applied to  $x \rightarrow x_+$  and the second inequality follows along the same lines as before.

To prove (f) it suffices by the triangle inequality to prove that  $\mathbb{E}_y[V_{\theta \sim p(\cdot|y)}(\log p(y_i|\theta))] \rightarrow 0$  as  $n \rightarrow \infty$ . This follows from

$$\begin{aligned} \mathbb{E}_y [\mathbb{E}_{\theta \sim p(\cdot|y)} [(\log p(y_i|\theta) - \log p(y_i|\theta_0))_+^2]] &\leq \mathbb{E}_{y, \theta} \left[ \log \left( 1 + \frac{C(y_i)p(y_i|\theta)\|\theta - \theta_0\|}{p(y_i|\theta_0)} \right)^2 \right] \\ &\leq \mathbb{E}_{y, \theta} [2C(y_i)\|\theta - \theta_0\|] \\ &\leq 2\mathbb{E}_{y, \theta} [C(y_i)^2]^{1/2} \mathbb{E}_{y, \theta} [\|\theta - \theta_0\|^2]^{1/2} \rightarrow 0. \end{aligned}$$

To prove that  $\mathbb{E}_y[\mathbb{E}_{\theta \sim p(\cdot|y)} [(\log p(y_i|\theta_0) - \log p(y_i|\theta))_+^2] \rightarrow 0$  is analogous.

For (g) and (h) it suffices to observe that  $\max_{i,j} |\text{Cov}(\theta(i), \theta(j))| \rightarrow 0$ . However

$$\begin{aligned} |\max_{i,j} \text{Cov}(\theta(i), \theta(j))| &= \max_i V(\theta(j)) \\ &\leq \max_i \mathbb{E}[\|\theta(i) - \theta_0(i)\|^2] \\ &\rightarrow 0 \end{aligned}$$

where the final conclusion follows from the consistency of  $\theta \sim p(\cdot|y)$  and the boundedness of  $\Theta$ . Hence (g) and (h) are established. Similarly (g2) and (h2) follows from (g), (h) and (e).

For (k), write  $r'(\theta_s) = r(\theta_s) / \sum_{j=1}^S r(\theta_j)$  for the random weights given to the individual  $\theta_s$ 's in the expression for  $\hat{p}(y_i|y_{-i})$ . Then we have, with  $\theta = (\theta_1, \dots, \theta_S)$



chosen according to  $q$ ,

$$\begin{aligned}
\mathbb{E}_y \left[ \left( \log \frac{\hat{p}(y_i|y_{-i})}{p(y_i|\theta_0)} \right)_+ \right] &= \mathbb{E}_{y,\theta} \left[ \left( \log \frac{\sum_{s=1}^S r'(\theta_s) p(y_i|\theta_s)}{p(y_i|\theta_0)} \right)_+ \right] \\
&\leq \mathbb{E}_{y,\theta} \left[ \log \left( 1 + \frac{\sum_{s=1}^S r'(\theta_s) |p(y_i|\theta_s) - p(y_i|\theta_0)|}{p(y_i|\theta_0)} \right) \right] \\
&\leq \mathbb{E}_{y,\theta} \left[ \log \left( 1 + C(y_i) \sum_{s=1}^S r'(\theta_s) \|\theta_s - \theta_0\| \right) \right] \\
&\leq \mathbb{E}_{y,\theta} \left[ \log \left( 1 + C(y_i) \sum_{s=1}^S \|\theta_s - \theta_0\| \right) \right] \\
&\leq \mathbb{E}_{y,\theta} \left[ C(y_i) \sum_{s=1}^S \|\theta_s - \theta_0\| \right] \\
&\leq \left( \mathbb{E}_{y_i} [C(y_i)^2] \mathbb{E}_{y,\theta} \left[ \left( \sum_{s=1}^S \|\theta_s - \theta_0\| \right)^2 \right] \right)^{1/2},
\end{aligned}$$

where the second inequality is condition (i) and the limit conclusion follows from the consistency of  $q$ . For the reverse inequality to go through analogously, observe that

$$\begin{aligned}
\frac{|p(y_i|\theta_0) - \sum_s r'(\theta_s) p(y_i|\theta_s)|}{\sum_s r'(\theta_s) p(y_i|\theta_s)} &\leq \frac{\sum_s r'(\theta_s) |p(y_i|\theta_s) - p(y_i|\theta_0)|}{\sum_s r'(\theta_s) p(y_i|\theta_s)} \\
&\leq \frac{\sum_s r'(\theta_s) p(y_i|\theta_s) \|\theta_s - \theta_0\|}{\sum_s r'(\theta_s) p(y_i|\theta_s)} \\
&\leq \max_s \|\theta_s - \theta_0\| \\
&\leq \sum_s \|\theta_s - \theta_0\|.
\end{aligned}$$

Equipped with this observation, mimic the above. □

## Reproducing results

### The arsenic data

For the spline model comparison we use the `rstanarm` R package [Goodrich et al., 2018] with the following R script.

```

# ' **Load data**
url <-
  "http://stat.columbia.edu/~gelman/arm/examples/arsenic/wells.dat"
wells <- read.table(url)

```

```

wells$dist100 <- with(wells, dist / 100)
wells$y <- wells$switch

#' **Centering the input variables**
wells$c_dist100 <- wells$dist100 - mean(wells$dist100)
wells$c_arsenic <- wells$arsenic - mean(wells$arsenic)
wells$c_educ4 <- wells$educ/4 - mean(wells$educ/4)

## **Latent linear model no interactions**
fit_1 <- stan_glm(y ~ c_dist100 + c_arsenic + c_educ4,
                 family = binomial(link="logit"),
                 data = wells,
                 iter = 1500,
                 warmup = 1000,
                 chains = 4)

## **Latent linear model**
fit_2 <- stan_glm(y ~ c_dist100 + c_arsenic + c_educ4 +
                 c_dist100:c_educ4 + c_arsenic:c_educ4,
                 family = binomial(link="logit"),
                 data = wells,
                 iter = 1500,
                 warmup = 1000,
                 chains = 4)

## **Latent GAM**
fit_3 <- stan_gamm4(y ~ s(dist100) + s(arsenic) + s(dist100, c_educ4),
                   family = binomial(link="logit"),
                   data = wells,
                   iter = 1500,
                   warmup = 1000,
                   chains = 4)

```

## Generating data and fitting regularized horse-shoe and normal model

```

library(arm)
library(rstanarm)

n <- 1e6

set.seed(1656)
x <- rnorm(n)
xn <- matrix(rnorm(n*99),nrow=n)
a <- 2
b <- 3
sigma <- 10
y <- a + b*x + sigma*rnorm(n)
fake <- data.frame(x, xn, y)

fit1 <- stan_glm(y ~ ., data=fake,
                mean_PPD=FALSE,
                refresh=0,
                seed=SEED,
                chains = 4,

```

```

warmup = 1000,
iter = 1500)

fit2 <- stan_glm(y ~ ., prior=hs(), data=fake,
mean_PPD=FALSE,
refresh=0,
seed=SEED,
chains = 4,
warmup = 1000,
iter = 1500)

```

## Models

### Stan Models

#### Bayesian linear regression (BLR)

```

data {
  int <lower=0> N;
  int <lower=0> D;
  matrix [N, D] X;
  vector [N] y;
}

parameters {
  vector [D] beta;
  real <lower=0> sigma;
}

model {
  // prior
  target += normal_lpdf(beta | 0, 10);
  target += normal_lpdf(sigma | 0, 1);
  // likelihood
  target += normal_lpdf(y | X * beta, sigma);
}

```

#### Pooled model (1)

```

data {
  int<lower=0> N;
  vector[N] floor_measure;
  vector[N] log_radon;
}

parameters {
  real alpha;
  real beta;
  real<lower=0> sigma_y;
}

model {
  vector[N] mu;

  // priors
  sigma_y ~ normal(0, 1);
}

```

```

alpha ~ normal(0, 10);
beta ~ normal(0, 10);

// likelihood
mu = alpha + beta * floor_measure;
for(n in 1:N){
  target += normal_lpdf(log_radon[n] | mu[n], sigma_y);
}
}

```

### Partially pooled model (2)

```

data {
  int<lower=0> N;
  int<lower=0> J;
  int<lower=1,upper=J> county_idx[N];
  vector[N] log_radon;
}
parameters {
  vector[J] alpha_raw;
  real mu_alpha;
  real<lower=0> sigma_alpha;
  real<lower=0> sigma_y;
}
transformed parameters {
  vector[J] alpha;
  // implies: alpha ~ normal(mu_alpha, sigma_alpha);
  alpha = mu_alpha + sigma_alpha * alpha_raw;
}
model {
  vector[N] mu;

  // priors
  sigma_y ~ normal(0,1);
  sigma_alpha ~ normal(0,1);
  mu_alpha ~ normal(0,10);
  alpha_raw ~ normal(0, 1);

  // likelihood
  for(n in 1:N){
    mu[n] = alpha[county_idx[n]];
    target += normal_lpdf(log_radon[n] | mu[n], sigma_y);
  }
}

```

### No pooled model (3)

```

data {
  int<lower=0> N;
  int<lower=0> J;
  int<lower=1,upper=J> county_idx[N];
  vector[N] floor_measure;
  vector[N] log_radon;
}

```

```

parameters {
  vector[J] alpha;
  real beta;
  real<lower=0> sigma_y;
}

model {
  vector[N] mu;
  // Prior
  sigma_y ~ normal(0, 1);
  alpha ~ normal(0, 10);
  beta ~ normal(0, 10);

  // Likelihood
  for(n in 1:N){
    mu[n] = alpha[county_idx[n]] + beta * floor_measure[n];
    target += normal_lpdf(log_radon[n] | mu[n], sigma_y);
  }
}

```

#### Variable intercept model (4)

```

data {
  int<lower=0> J;
  int<lower=0> N;
  int<lower=1,upper=J> county_idx[N];
  vector[N] floor_measure;
  vector[N] log_radon;
}

parameters {
  vector[J] alpha_raw;
  real beta;
  real mu_alpha;
  real<lower=0> sigma_alpha;
  real<lower=0> sigma_y;
}

transformed parameters {
  vector[J] alpha;
  // implies: alpha ~ normal(mu_alpha, sigma_alpha);
  alpha = mu_alpha + sigma_alpha * alpha_raw;
}

model {
  vector[N] mu;

  // Prior
  sigma_y ~ normal(0,1);
  sigma_alpha ~ normal(0,1);
  mu_alpha ~ normal(0,10);
  beta ~ normal(0,10);
  alpha_raw ~ normal(0, 1);

  for(n in 1:N){
    mu[n] = alpha[county_idx[n]] + floor_measure[n]*beta;
    target += normal_lpdf(log_radon[n]|mu[n],sigma_y);
  }
}

```

## Variable slope model (5)

```
data {
  int<lower=0> J;
  int<lower=0> N;
  int<lower=1,upper=J> county_idx[N];
  vector[N] floor_measure;
  vector[N] log_radon;
}

parameters {
  real alpha;
  vector[J] beta_raw;
  real mu_beta;
  real<lower=0> sigma_beta;
  real<lower=0> sigma_y;
}

transformed parameters {
  vector[J] beta;
  // implies: beta ~ normal(mu_beta, sigma_beta);
  beta = mu_beta + sigma_beta * beta_raw;
}

model {
  vector[N] mu;
  // Prior
  alpha ~ normal(0,10);
  sigma_y ~ normal(0,1);
  sigma_beta ~ normal(0,1);
  mu_beta ~ normal(0,10);
  beta_raw ~ normal(0, 1);

  for(n in 1:N){
    mu[n] = alpha + floor_measure[n] * beta[county_idx[n]];
    target += normal_lpdf(log_radon[n]|mu[n],sigma_y);
  }
}
```

## Variable intercept and slope model (6)

```
data {
  int<lower=0> N;
  int<lower=0> J;
  int<lower=1,upper=J> county_idx[N];
  vector[N] floor_measure;
  vector[N] log_radon;
}

parameters {
  real<lower=0> sigma_y;
  real<lower=0> sigma_alpha;
  real<lower=0> sigma_beta;
  vector[J] alpha_raw;
  vector[J] beta_raw;
  real mu_alpha;
  real mu_beta;
}
```

```

}
transformed parameters {
  vector[J] alpha;
  vector[J] beta;
  // implies: alpha ~ normal(mu_alpha, sigma_alpha);
  alpha = mu_alpha + sigma_alpha * alpha_raw;
  // implies: beta ~ normal(mu_beta, sigma_beta);
  beta = mu_beta + sigma_beta * beta_raw;
}

model {
  vector[N] mu;
  // Prior
  sigma_y ~ normal(0,1);
  sigma_beta ~ normal(0,1);
  sigma_alpha ~ normal(0,1);
  mu_alpha ~ normal(0,10);
  mu_beta ~ normal(0,10);
  alpha_raw ~ normal(0, 1);
  beta_raw ~ normal(0, 1);

  // Likelihood
  for(n in 1:N){
    mu[n] = alpha[county_idx[n]] + floor_measure[n] * beta[county_idx[n]];
    target += normal_lpdf(log_radon[n] | mu[n], sigma_y);
  }
}

```

## References

- Ben Goodrich, Jonah Gabry, Imad Ali, and Sam Brilleman. rstanarm: Bayesian applied regression modeling via Stan., 2018. URL <http://mc-stan.org/>. R package version 2.17.4.
- Edward L Ionides. Truncated importance sampling. *Journal of Computational and Graphical Statistics*, 17(2):295–311, 2008.
- Måns Magnusson, Michael Andersen, Johan Jonasson, and Aki Vehtari. Bayesian leave-one-out cross-validation for large data. In *Proceedings of the 36th International Conference on Machine Learning*, volume 97 of *Proceedings of Machine Learning Research*, pages 4244–4253. PMLR, 2019.
- Andrew M Walker. On the asymptotic behaviour of posterior distributions. *Journal of the Royal Statistical Society. Series B (Methodological)*, pages 80–88, 1969.
- Yixin Wang and David M Blei. Frequentist consistency of variational Bayes. *Journal of the American Statistical Association*, 114(527):1147–1161, 2019.
